# Supplementary material for: Synthesis of CeO2 assemblies through interaction with short-chain dicarboxylic acids under facile hydrothermal conditions
Source: Royal Society of Chemistry journal article supplement (doi:10.1039/c9ra04245h), 2019-01-01
Supplement: c9ra04245h1.pdf [file c9ra04245h1.pdf]

# Supporting Information

## **Synthesis of CeO<sub>2</sub> assemblies through interaction with short-chain dicarboxylic acids under facile hydrothermal conditions**

*Xinsong Huang,<sup>1,2</sup> Liping Li,<sup>3</sup> Guangshe Li<sup>1,3\*</sup>*

1. Key Laboratory of Design and Assembly of Functional Nanostructures, Fujian Institute of Research on the Structure of Matter, Chinese Academy of Sciences, Fuzhou 350002, P.R. China

2. University of Chinese Academy of Sciences, Beijing 100049, P.R. China

3. State Key Laboratory of Inorganic Synthesis & Preparative Chemistry, College of Chemistry, Jilin University, Changchun 130012, P.R. China

### AUTHOR INFORMATION

#### **Corresponding Author**

\* E-mail: [guangshe@jlu.edu.cn](mailto:guangshe@jlu.edu.cn)

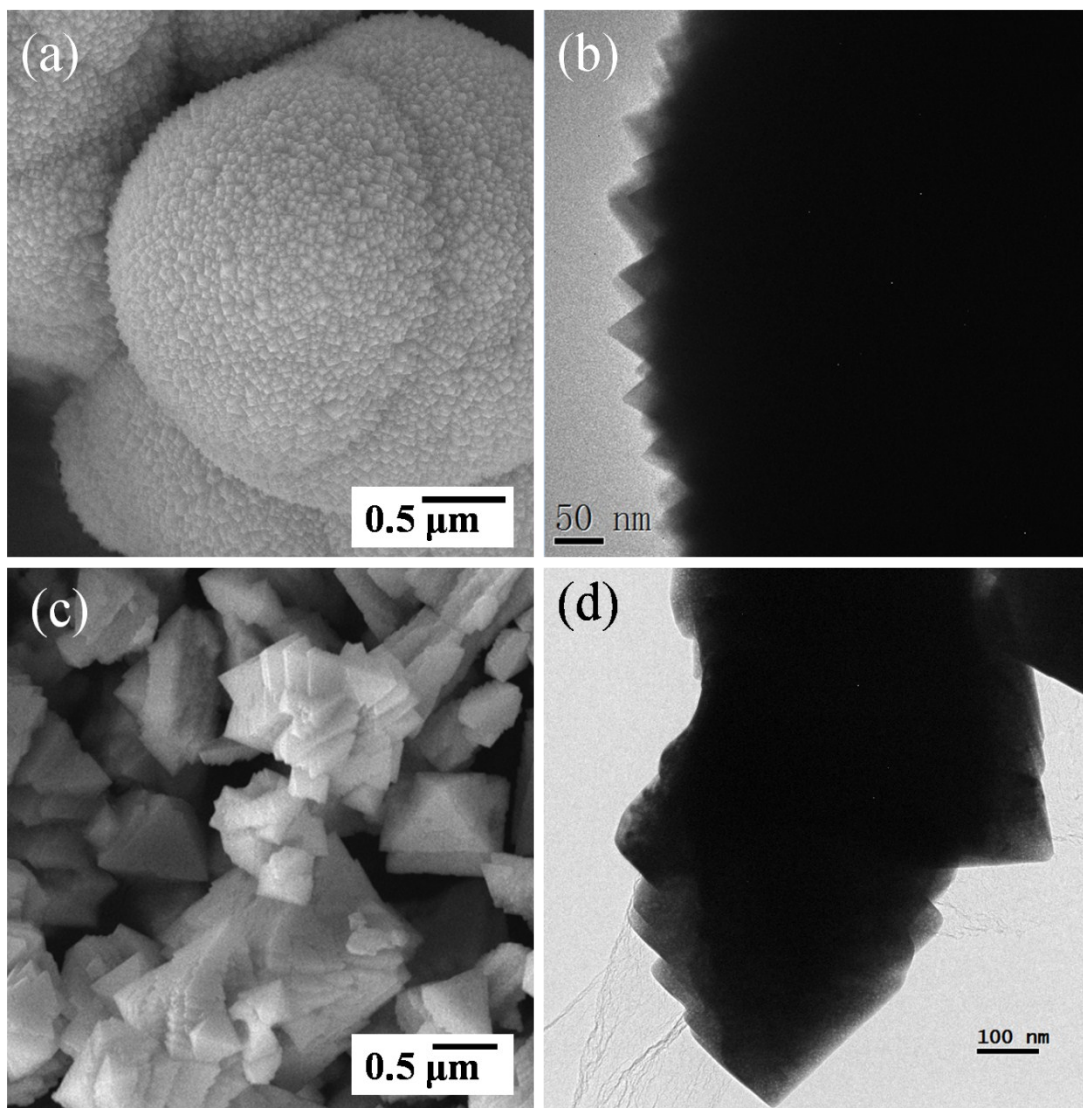

Fig. S1 (a) Morphological characterization of Ce-PA-p and Ce-EA-p samples: (a) and (b), SEM & TEM images of Ce-PA-p, (c) and (d), SEM & TEM images of Ce-EA-p.

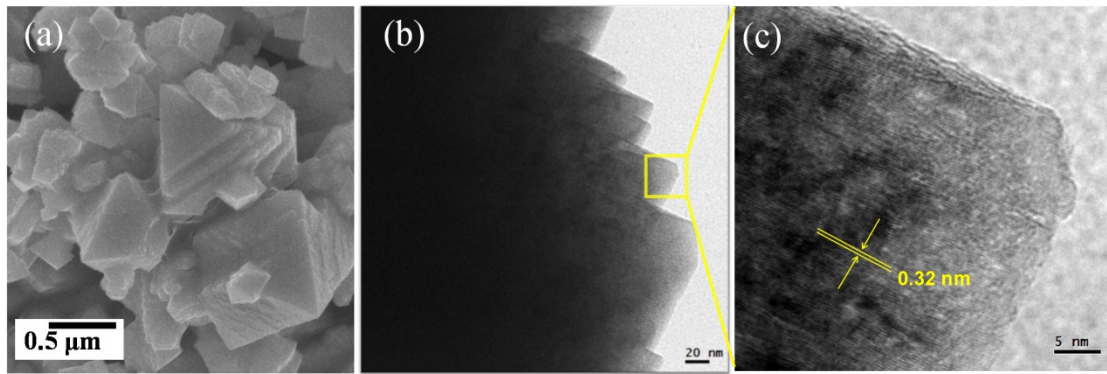

Fig. S2 Morphological characterization of Ce-EA sample: (a) SEM, (b) TEM and (c) HRTEM images. The inter-planar spacing along the facets is 0.32 nm, corresponding to the (111) planes of  $\text{CeO}_2$ .

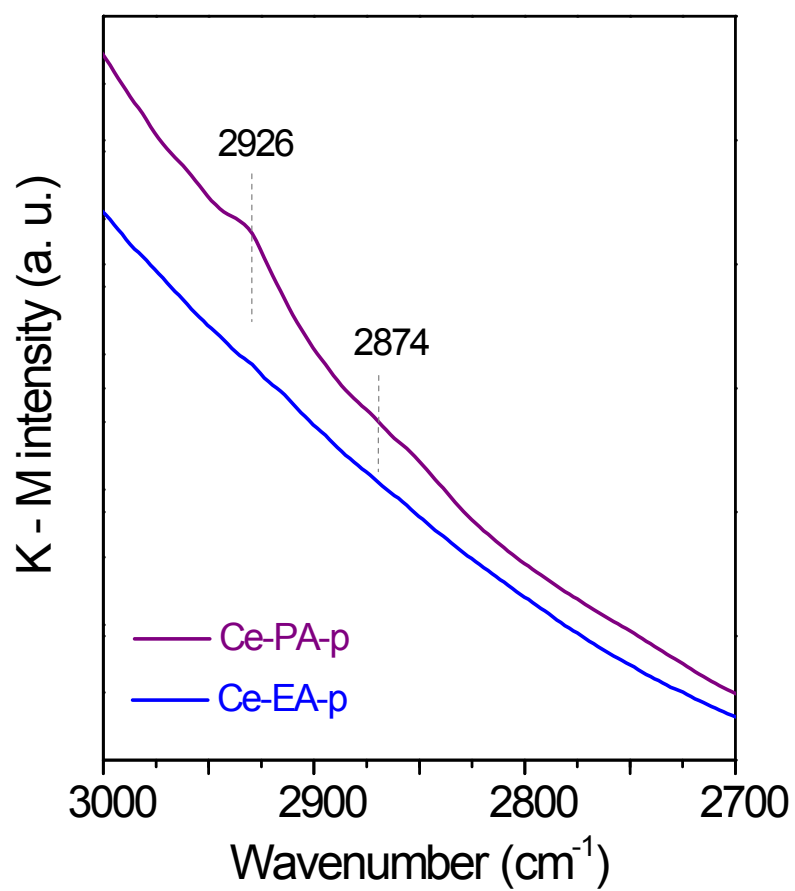

Fig. S3 DRIFTS spectra for Ce-EA-p and Ce-PA-p at the band range from 3000 cm<sup>-1</sup> to 2700 cm<sup>-1</sup>.

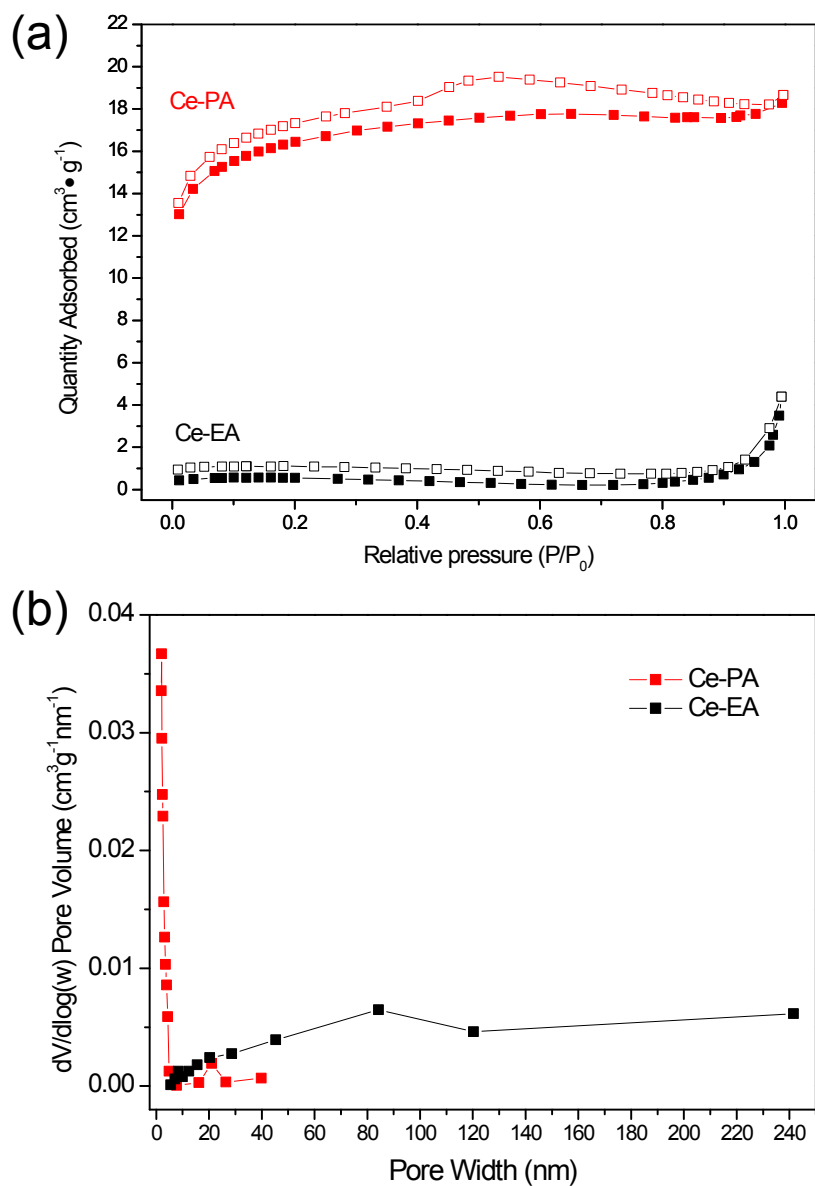

Fig. S4  $N_2$  adsorption–desorption isotherms (a) and the corresponding pore size distribution curves (b) of Ce-PA and Ce-EA.

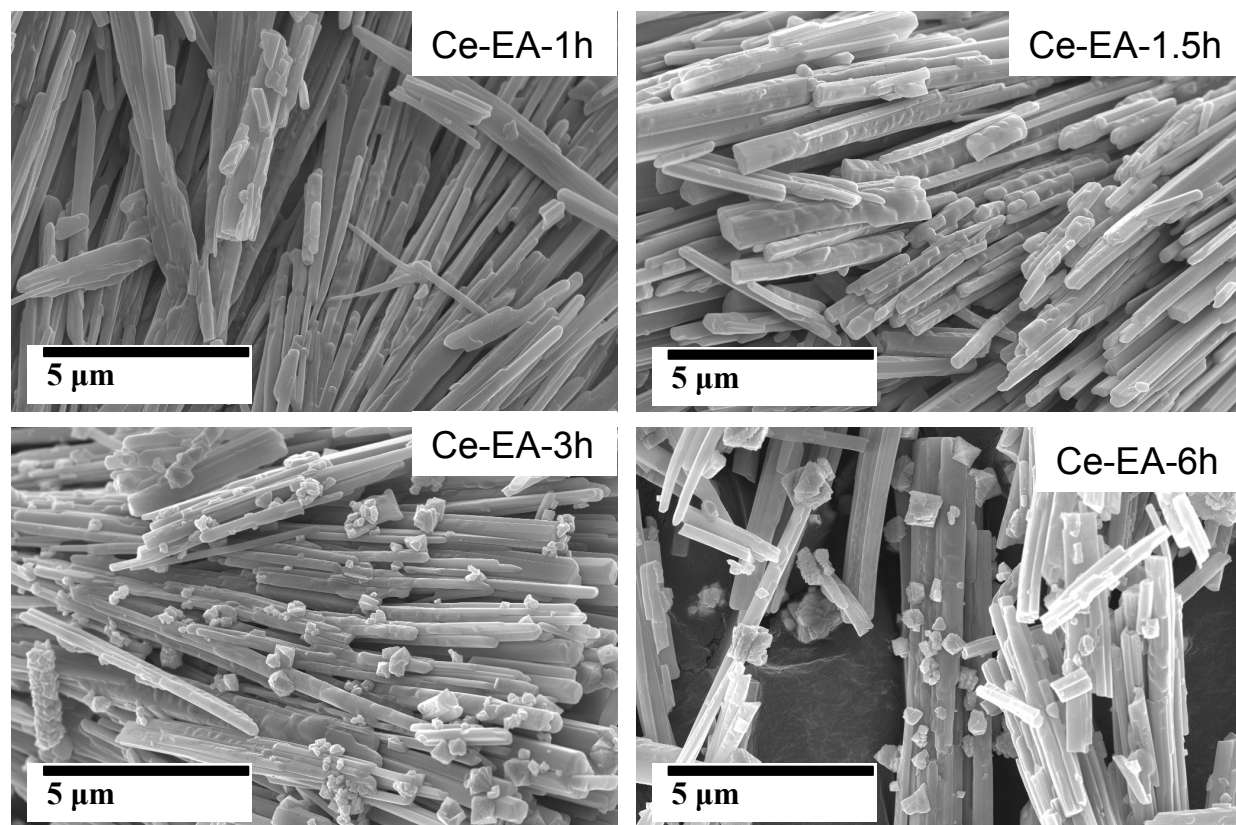

Fig. S5 SEM images of Ce-EA-xh samples,  $x = 1, 1.5, 3, \text{ or } 6$ , which represents the times in hour at the fixed temperature of  $180\text{ }^{\circ}\text{C}$ .

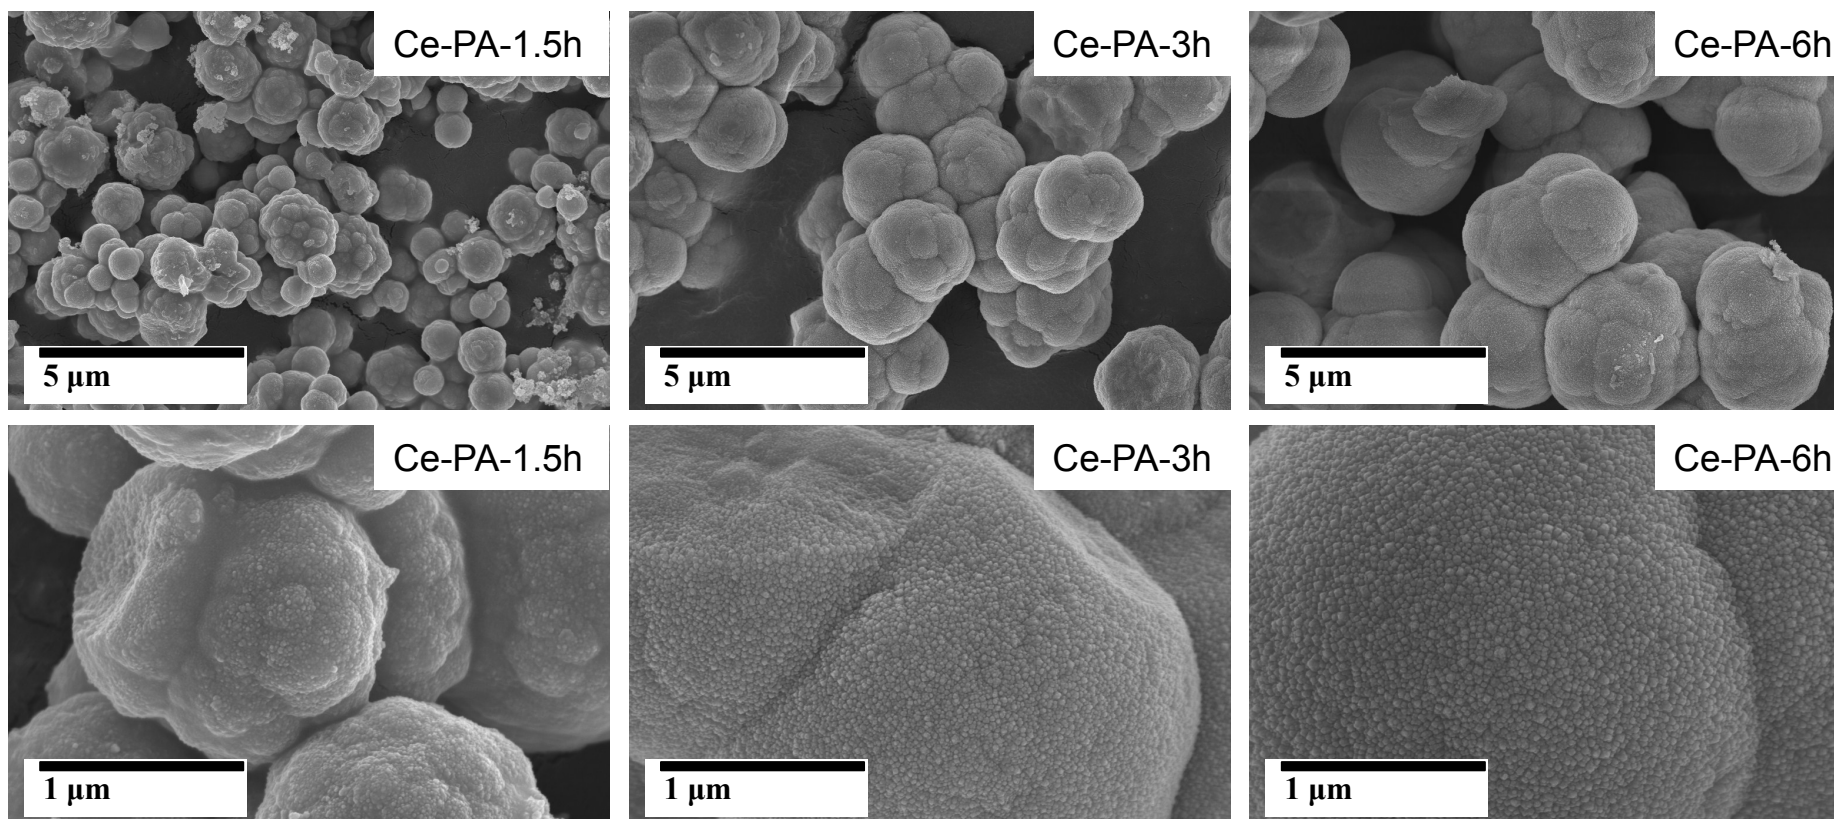

Fig. S6 SEM images of Ce-PA-xh samples,  $x = 1, 1.5, 3, \text{ or } 6$ , which represents the times in hour at the fixed temperature of  $180\text{ }^{\circ}\text{C}$ .
